1

2

3

4 **Failure to modulate reward prediction errors in declarative learning with theta**

5 **(6 Hz) frequency transcranial alternating current stimulation**

6

7

8 Kate Ergo<sup>1\*</sup>, Esther De Loof<sup>1</sup>, Gillian Debra<sup>1</sup>, Bernhard Pastötter<sup>2</sup>, and Tom Verguts<sup>1</sup>

9

10 <sup>1</sup>Department of Experimental Psychology, Ghent University, Henri Dunantlaan 2, Ghent,

11 Belgium

12 <sup>2</sup>Department of Psychology, University of Trier, Trier, Germany

13

14 \* Corresponding author

15 E-mail: [kate.ergo@ugent.be](mailto:kate.ergo@ugent.be) (KE)

16

17

18

19  
20  
21  
22  
23  
24  
25  
26  
27  
28  
29  
30  
31  
32  
33  
34  
35  
36  
37  
38

## Abstract

Recent evidence suggests that reward prediction errors (RPEs) play an important role in declarative learning, but its neurophysiological mechanism remains unclear. Here, we tested the hypothesis that RPEs modulate declarative learning via theta-frequency oscillations, which have been related to memory encoding in prior work. For that purpose, we examined the interaction between RPE and transcranial Alternating Current Stimulation (tACS) in declarative learning. Using a between-subject (real versus sham stimulation group), single-blind stimulation design, 76 participants learned 60 Dutch-Swahili word pairs, while theta-frequency (6 Hz) tACS was administered over the medial frontal cortex (MFC). Previous studies have implied MFC in memory encoding. We replicated our previous finding of signed RPEs (SRPEs) boosting declarative learning; with larger and more positive RPEs enhancing memory performance. However, tACS failed to modulate the SRPE effect in declarative learning and did not affect memory performance. Bayesian statistics supported evidence for an absence of effect. Our study confirms a role of RPE in declarative learning, but also calls for standardized procedures in transcranial electrical stimulation.

*Keywords:* declarative learning, reward prediction error, tACS

39

## Introduction

40 Declarative memory consists of memory for facts and events that can be consciously  
41 recalled [1,2]. Memoranda are learned rapidly, often after a single exposure [3]. The process of  
42 acquiring such memories is called declarative learning. Declarative memory differs from  
43 procedural memory, where a skill is learned slowly and by means of repeated practice (e.g.,  
44 learning how to drive a car). Research has firmly established that prediction errors modulate  
45 declarative memory [4]. Recent research shows that reward prediction errors (RPE; i.e.,  
46 mismatches between reward outcome and reward prediction) specifically may facilitate  
47 memory formation. RPEs were primarily studied within procedural learning. However, recent  
48 evidence suggests that RPEs are crucial for declarative learning as well [5,6].

49 One robust experimental paradigm to test this RPE effect on declarative memory, was  
50 proposed in [7]. Here, a variable-choice experimental paradigm was used where participants  
51 learned Dutch-Swahili word pairs. On each trial, participants were presented with one Dutch  
52 word and four Swahili translations. By fixing a priori the number of eligible Swahili translations  
53 and whether a choice was rewarded or not, each trial was associated with a unique RPE. This  
54 manipulation allowed verifying whether declarative learning was driven by unsigned RPEs  
55 (URPE; signifying that the outcome is different than expected) or instead by signed RPEs (SRPE;  
56 indicating that the outcome is better or worse than expected). If URPEs boost declarative  
57 learning, recognition of word pairs should be enhanced for large positive and large negative  
58 RPE values, exhibiting a U-shaped effect of RPE on memory. Instead, if SRPEs drive declarative  
59 learning, recognition should be increased only for large, positive RPEs. The data revealed a SRPE

60 effect. Larger and more positive RPEs during study improved subsequent declarative memory  
61 during testing. The effect of RPEs in this experimental paradigm was further substantiated in a  
62 follow-up EEG study, where oscillatory signatures at reward feedback were detected in the  
63 theta (4-8 Hz), high-beta (20-30 Hz) and high-alpha (10-15 Hz) frequency ranges, suggesting the  
64 experience of RPEs by the participants [8]. Further validation came from an fMRI study using a  
65 similar paradigm in which famous faces were associated with Swahili village names [9]. This  
66 study revealed that RPE responses in the ventral striatum (VS) at reward feedback predicted  
67 memory performance. These findings lend further support to the notion that RPE is a key factor  
68 in the formation of new declarative memories, and that RPEs are characterized by distinctive  
69 neural signatures.

70 It remains unclear, however, how RPEs boost declarative memory. It is well established that  
71 RPEs are encoded by dopaminergic neurons in the midbrain (i.e., ventral tegmental area and  
72 substantia nigra) [10]. These neurons change their firing rate in relation to RPEs. From the  
73 midbrain, RPEs are projected to several other subcortical and cortical brain regions, such as the  
74 VS [11], the hippocampus (HC) [12], and medial frontal cortex (MFC) [13]. Within these brain  
75 structures, dopamine release functions as a neuromodulatory signal. One potential  
76 neuromodulatory influence of dopamine occurs via modulating neural oscillations in a wide  
77 range of frequency bands [14]. Neural activity in the theta frequency band (4-8 Hz) seems to be  
78 of particular importance in memory encoding [15]. Indeed, oscillations in the theta frequency  
79 allow communication between distant brain regions, promote encoding of novel information  
80 [16], enable learning [17], and have been linked to improved declarative memory [18–20].

81        One possible mechanism through which theta frequency improves memory is theta phase  
82        synchronization. Synchronization in declarative memory can be observed locally, for example,  
83        using intracranial electrodes placed in the medial temporal lobe. With this method, [21] found  
84        increased theta phase locking during the encoding of words. Theta phase synchronization can  
85        also be observed non-locally. When multimodal (audio-visual) stimuli are synchronously  
86        presented in theta phase, episodic memory is enhanced; with stronger theta phase  
87        synchronization between the visual and auditory cortex predicting better memory performance  
88        [22,23]. Furthermore, [24] observed increased theta phase synchronization between HC and  
89        prefrontal cortex (PFC) during the presentation of unexpected items. Interestingly, the PFC, and  
90        in particular the MFC, has been ascribed an important role in memory encoding [25–27]. It is  
91        also strongly implied in reward [28,29] and RPE [30,31] processing. We hypothesize that during  
92        declarative learning, RPEs project to the MFC [13], where they are used to optimize future  
93        behavior [32]. Specifically, RPEs may (by means of neuromodulatory signaling) increase theta  
94        (phase) synchronization between relevant brain areas (e.g., MFC and HC), therefore allowing  
95        associative memories to be glued together more efficiently [33], facilitating (multimodal)  
96        memory formation [34].

97        Unfortunately, the evidence for theta modulation of RPEs in declarative memory thus far  
98        remains correlational only. With the rise of non-invasive brain stimulation (NIBS) techniques,  
99        the causal role of neural oscillations and their relation to behavior can be explicitly tested [35].  
100        More specifically, transcranial Alternating Current Stimulation (tACS) allows modulating neural  
101        oscillations [36]. It is hypothesized that tACS causes underlying brain networks to synchronize  
102        or desynchronize. Although tACS has rather low temporal and spatial resolution, its frequency

103 resolution is high. By applying a weak sinusoidal current to the scalp, the likelihood of neural  
104 firing is increased or decreased, depending on the stimulation parameters [37]. Ongoing neural  
105 oscillations can thus be entrained at specific frequencies of interest [37]. This synchronization  
106 modulates brain activity and alters cognitive processes, leading to behavioral changes, which  
107 can be measured through, for example, memory performance [38].

108       Whereas several tACS experiments entraining oscillations at theta frequency looked at its  
109 effects on working memory [39–44], a few studies have investigated its effects on declarative  
110 memory. [45] applied theta-frequency tACS over the right fusiform cortex while face and scene  
111 pairs were encoded. Here, stimulation enhanced memory performance measured after a 24-  
112 hour delay. Similarly, [46] also found enhanced long-term memory performance after applying  
113 theta-frequency tACS over the right posterior cortex while participants learned face-monetary  
114 value pairs. To the best of our knowledge, no study examined the effects of theta-frequency  
115 tACS over MFC in relation to declarative learning.

116       Together, these findings suggest that RPEs are projected from brainstem to MFC; elicit theta  
117 phase synchronization between several neural areas; and thus boost declarative learning. As  
118 such, the goal of the current study was to use theta-frequency (6 Hz) tACS to entrain neural  
119 oscillations whilst encoding new word pairs associated with RPEs of different sizes and values.  
120 To this end, tACS was applied over the MFC while participants acquired 60 Dutch-Swahili word  
121 pairs using the variable-choice experimental paradigm. We hypothesized that if memory is  
122 modulated by theta oscillations in MFC, then subsequent memory performance and certainty  
123 ratings should be modulated by tACS; and if theta oscillations are driven by RPE, as the  
124 literature review suggests, tACS and RPE should interact.

125

## Methods

126

### Participants

127

We tested a total of 77 healthy, Dutch-speaking participants. One participant was excluded

128

from further analysis due to below chance level performance on the recognition test. The

129

analyses were run on the remaining 76 participants (57 females, range = 18-29 years,  $M_{age} =$

130

20.8 years,  $SD_{age} = 2.4$  years). All participants had no prior knowledge of Swahili, gave written

131

informed consent, were randomly assigned to a real ( $N = 38$ ) or sham ( $N = 38$ ) stimulation

132

group, and were paid €17.5. The study was approved by the Medical Ethics Review Board of the

133

Ghent University Hospital and was carried out in accordance with the Declaration of Helsinki.

134

### Material

135

A total of 330 words (66 Dutch, 24 Japanese and 240 Swahili words) (S1 Tables) were used.

136

Each participant memorized 60 Dutch-Swahili word pairs. The experiment was run on an HP

137

ProBook 6560b laptop with a 15.6" screen size running PsychoPy software (version 1.85.4) [47].

138

### Experimental paradigm

139

#### *Familiarization task*

140

Participants started with a familiarization task using the stimuli in the experiment, to

141

control for the novelty of the foreign Swahili words. All Dutch ( $N = 60$ ) and Swahili ( $N = 240$ )

142

words were randomly and sequentially presented on the screen for a duration of two seconds.

143

Participants were asked to press the space bar whenever a Dutch word was presented.

144 ***Acquisition task***

145           Prior to the actual acquisition task, a total of six practice trials with Dutch (N = 6) and  
146 Japanese (N = 24) words was presented. After successfully finishing the practice set,  
147 participants were presented with the acquisition task. Here, the aim was to learn 60 unique  
148 Dutch-Swahili word pair associations. On each trial, one Dutch word was shown together with  
149 four Swahili translations (Fig 1A). After four seconds, frames surrounded the eligible Swahili  
150 translations. Either one, two or four Swahili translations were framed. In the one-option  
151 condition, one Swahili translation was framed and participants could only choose this Swahili  
152 word as the translation for the Dutch word. In the two-option condition, two Swahili  
153 translations were framed and participants could choose between two options. In the four-  
154 option condition trials, all four Swahili translations were framed and participants could choose  
155 among these four options. The probability of choosing the correct Swahili translation was  
156 therefore 100% (in one-option condition trials), 50% (in two-option condition trials), or 25% (in  
157 four-option condition trials). Participants responded with the index and middle finger of the  
158 right and left hand. For stimulation purposes, trial duration was controlled by instructing  
159 participants to make their choice as soon as the fixation cross turned blue. If no choice was  
160 made after two seconds, the fixation cross turned red, urging participants to choose as soon as  
161 possible. To ensure that stimulation was given throughout the entire duration of the acquisition  
162 task, total time spent in the acquisition task was equated for each participant. Specifically, if  
163 participants made a choice less than two seconds after the fixation cross turned blue, feedback  
164 was presented after [two seconds - choice duration] seconds. After participants made their  
165 choice, the fixation cross turned into a blue “o” indicating that their response had been



166 registered. They were then provided with feedback where they saw the Dutch word, an  
167 equation sign, and the to-be-learned Swahili translation (in green for correct choices and in red  
168 for incorrect choices) for a duration of five seconds. This was followed by reward feedback (+0.5  
169 Euros for correct choices and +0 Euros for incorrect choices) and a reward update telling them  
170 how much money they earned up until the last completed trial (two seconds). After every ten  
171 trials, the acquisition task was briefly paused for ten seconds to allow an impedance check.

172 **Fig 1. Experimental paradigm and tACS setup.** (A) Example trial of the acquisition task and  
173 recognition test. In the acquisition task, participants choose between 1, 2 or 4 Swahili  
174 translations. The two-option condition with rewarded choice is illustrated. (B) Experimental  
175 design. The 2 (rewarded or unrewarded choice) x 3 (number of options) experimental design  
176 showing the number of trials and associated RPE value in each cell. SRPEs were calculated by  
177 subtracting the probability of reward from the obtained reward; URPE is the absolute value of  
178 SRPE. (C) tACS setup. Theta-frequency (6 Hz) tACS was applied over the MFC. The stimulation  
179 electrode (i.e., blue electrode) was placed over FCz, while the reference electrode (i.e., red  
180 electrode) was placed in the neck.

181 **Design.** Parametric modulation of RPEs was accomplished by fixing a priori the number  
182 of options (one, two or four) and reward on each trial (reward/no reward). This allowed the  
183 computation of an RPE for each cell of the design (Fig 1B). Note that by predetermining reward  
184 feedback at each trial, participants did not necessarily learn the actual Swahili translations of  
185 the Dutch words. For example, if a trial belonged to the rewarded condition, participants  
186 received positive feedback irrespective of their choice. Participants were unaware of this  
187 manipulation during the experiment, but were debriefed afterwards.

188 SRPEs were obtained by subtracting reward probability from reward outcome. For  
189 rewarded trials, reward outcome is equal to one, whereas reward outcome is equal to zero for  
190 unrewarded trials. Reward probability is determined by the number of options. URPEs are  
191 computed by taking the absolute value of the SRPE.

## 192 ***Recognition task***

193 In the recognition task, participants' recognition was tested on 60 Dutch-Swahili word pairs  
194 (Fig 1A). On each trial, one Dutch word was shown together with the same four Swahili  
195 translations from the acquisition task. Spatial positions of the Swahili translations were  
196 randomly shuffled relative to the acquisition task to avoid that participants would respond  
197 based on the spatial position instead of the actual translation of the Dutch word. In contrast to  
198 the acquisition task, no frames surrounded the Swahili translations, and no feedback was  
199 provided. No time limit was imposed. At the end of each trial, participants rated their certainty  
200 on a four-point scale ("very certain", "rather certain", "rather uncertain", "very uncertain").

## 201 **Sensations questionnaire**

202 A subset of participants (N = 61) filled out a sensations questionnaire [48] (S2 File).  
203 Participants rated seven sensations (itching, pain, burning, warmth/heat, pinching,  
204 metallic/iron taste and fatigue) on a five-point scale (none, mild, moderate, considerable,  
205 strong). They were also asked when the discomfort began, how long the discomfort lasted and  
206 how much these sensations affected their performance. The sensations questionnaire was used

207 to verify whether participants in the real and sham stimulation group report a difference in  
208 sensations.

## 209 **tACS stimulation**

210 tACS stimulation was applied using a DC-stimulator Plus device (NeuroConn GmbH,  
211 Ilmenau/Germany). Two saline-soaked sponge electrodes (5 x 6.5 cm<sup>2</sup>) were placed on the scalp  
212 and neck. The stimulation (blue) electrode was positioned at FCz (according to the 10-20  
213 positioning system), targeting the MFC, while the reference (red) electrode was placed in the  
214 neck (Fig 1C). The sponge electrodes were fixed onto the participant's head with elastic fabric  
215 bands. Impedance between electrodes was kept below 15 kΩ. Participants received tACS  
216 stimulation at the theta (6 Hz) frequency with an intensity of 2 mA (peak-to-peak; mean 0 mA).  
217 A sinusoidal stimulation waveform was used with no DC offset and a phase shift of zero  
218 degrees. A fade-in and fade-out period of 5 seconds (30 cycles) was used. tACS was  
219 administered during the entire acquisition task for a duration of 16.6 minutes (6000 cycles) in  
220 the real stimulation group, while the sham stimulation group received 40 seconds (240 cycles)  
221 of stimulation. Sham stimulation duration was kept short to avoid changes in cortical  
222 excitability [49].

## 223 **Data analysis**

224 Both frequentist and Bayesian statistics were calculated. With regard to frequentist  
225 statistics, all data were analyzed within the linear mixed effects framework in R software [50],  
226 unless mentioned otherwise. For continuous dependent variables (e.g., certainty ratings in the

227 recognition test) linear mixed effects models were used, while for categorical dependent  
228 variables (e.g., recognition accuracy) generalized linear mixed effects models were applied. A  
229 random intercept for participants was included in each model, while all predictors were mean-  
230 centered. Note that SRPEs were treated as a continuous predictor allowing the inclusion of all  
231 60 trials per participant to estimate its regression coefficient, with the exception of invalid trials  
232 (i.e., trials on which a non-framed Swahili translation was chosen during the acquisition task).

233 In addition to frequentist statistics, Bayesian repeated measures analyses of variance  
234 (ANOVAs) are reported that were performed in JASP (version 0.11.1; [51]). In Bayesian ANOVAs,  
235 recognition accuracy and certainty ratings were analyzed as a function of SRPE and stimulation.  
236 Bayes factors (BFs) quantify the evidence in favor of the null hypothesis ( $BF_{01}$ ; e.g., tACS does  
237 not influence memory performance) or the alternative hypothesis ( $BF_{10} = 1/BF_{01}$ ; e.g., tACS  
238 influences memory performance).  $BF_{01}$  is reported when the Bayesian analysis provides  
239 relatively more evidence for the null hypothesis;  $BF_{10}$  is instead reported when the analysis  
240 provides relatively more evidence for the alternative hypothesis. We used default prior settings  
241 for all analyses [52]. To determine the strength of evidence, we used Jeffreys' benchmarks [53],  
242 with BFs corresponding to anecdotal (0-3), substantial (3-10), strong (10-30), very strong (30-  
243 100) or decisive (>100) evidence.

## 244 Results

### 245 Sensations questionnaire

246 Independent samples t-tests were used to verify whether sensations varied between the  
247 two stimulation groups. Participants in the real and sham stimulation groups did not report a  
248 significant difference for any of the sensations probed (itching, pain, burning, warmth/heat,  
249 pinching, metallic/iron taste and fatigue) (all  $p > .06$ ). Furthermore, there were no significant  
250 differences between stimulation groups with regard to when the discomfort began,  $t(58.90) =$   
251  $0.48$ ,  $p = .63$ , and how much these sensations affected their performance,  $t(53.77) = 1.13$ ,  $p =$   
252  $.26$ . Participants in the real stimulation group did report that the discomfort lasted significantly  
253 longer compared to the sham stimulation group,  $t(40.33) = 3.35$ ,  $p = .002$ .

## 254 **Recognition accuracy**

255 The data revealed a significant main effect of reward,  $\chi^2(1, N = 76) = 5.82$ ,  $p = .02$ .  
256 Recognition accuracy was slightly lower for rewarded choices ( $M = 64.6\%$ ,  $SD = 14.4\%$ ,  
257 range = 26%–97%) compared to unrewarded choices ( $M = 66.4\%$ ,  $SD = 15.8\%$ , range = 32%–  
258 100%). Recognition accuracy increased with number of options,  $\chi^2(1, N = 76) = 33.80$ ,  $p < .001$ ,  
259 (one-option:  $M = 60.5\%$ ,  $SD = 17.7\%$ , range = 25%–95%; two-option:  $M = 65.5\%$ ,  $SD = 15.9\%$ ,  
260 range = 25%–100%; four-option:  $M = 70.2\%$ ,  $SD = 15.7\%$ , range = 35%–100%). The interaction  
261 between reward and number of options was not significant,  $\chi^2(1, N = 76) = 0.98$ ,  $p = .32$ .

262 Next, we verified whether recognition accuracy linearly increased with SRPEs. Replicating  
263 earlier research, frequentist statistics revealed a significant positive effect of SRPE,  $\chi^2(1, N = 76)$   
264  $= 9.13$ ,  $p = .003$ , with larger and more positive RPEs leading to increased recognition accuracy  
265 (Fig 2A-B). There was no main effect of stimulation on recognition accuracy,  $\chi^2(1, N = 76) = 1.42$ ,

266  $p = .23$ . The interaction between SRPE and stimulation was also not significant,  $\chi^2(1, N = 76) =$   
267  $.004, p = 0.95$ .

268 **Fig 2. Results.** (A-B) Recognition accuracy as a function of SRPE in the real and sham stimulation  
269 group, respectively. Recognition accuracy increases linearly with larger and more positive RPEs  
270 in the two stimulation groups, suggesting a SRPE effect. (C-D) Certainty rating in the real and  
271 sham stimulation group, respectively. In the two stimulation groups, SRPE significantly  
272 predicted certainty for correctly recognized word pairs, but not for incorrectly recognized word  
273 pairs.

274 Bayesian repeated measures ANOVA provided substantial evidence for the absence of a  
275 stimulation effect ( $BF_{01} = 3.02$ , against the null model). The observed data were about 3 times  
276 more likely under the null hypothesis than under the alternative hypothesis. The evidence for  
277 the SRPE effect was decisive ( $BF_{10} > 100$ , compared to null model). In addition, there was strong  
278 evidence against the interaction of SRPE and stimulation ( $BF_{01} = 54.66$ , compared to two-main-  
279 effects model).

## 280 **Certainty ratings**

281 For the certainty ratings there was a significant main effect of recognition accuracy,  $\chi^2(1, N$   
282  $= 76) = 1170, p < .001$ , indicating that participants were more certain of correctly recognized  
283 word pairs. In addition, there was a significant interaction between SRPE and recognition  
284 accuracy,  $\chi^2(1, N = 76) = 7.63, p = .006$ . Follow-up analysis revealed that, as expected, SRPE  
285 increased certainty for correctly recognized word pairs,  $\chi^2(1, N = 76) = 9.14, p = .002$ , but did  
286 not affect false recognitions, i.e., incorrectly recognized word pairs,  $\chi^2(1, N = 76) = 2.16, p = .14$

287 (Fig 2C-D). In addition, the data revealed a significant interaction between stimulation and  
288 recognition accuracy,  $\chi^2(1, N = 76) = 5.37, p = .02$ . Follow-up analysis revealed a main effect of  
289 stimulation for the correctly recognized word pairs,  $\chi^2(1, N = 76) = 5.03, p = .02$ , but not for  
290 incorrectly recognized word pairs,  $\chi^2(1, N = 76) = 0.11, p = .75$ . Participants in the sham  
291 stimulation group were more certain of correctly recognized word pairs, compared to  
292 participants in the real stimulation group. The interaction between SRPE and stimulation was  
293 not significant,  $\chi^2(1, N = 76) = 1.61, p = .20$ .

294 A Bayesian repeated measures ANOVA revealed anecdotal evidence for the absence of a  
295 stimulation effect ( $BF_{01} = 1.33$ , against the null model). For the SRPE effect, the evidence was  
296 decisive ( $BF_{10} > 100$ , compared to null model). We also found strong evidence against the  
297 interaction of SRPE and stimulation ( $BF_{01} = 19.74$ , compared to two-main-effects model).

## 298 Discussion

299 The main objective of our study was to examine if theta-frequency (6 Hz) tACS can  
300 modulate the effect of RPEs in declarative learning. For this purpose, participants acquired 60  
301 Dutch-Swahili word pairs, associated with RPEs of different sizes and values, while the MFC was  
302 stimulated. We replicated our earlier finding of SRPEs driving declarative learning [7]. Word pair  
303 recognition increased for large and positive RPEs. However, contrary to our hypothesis, theta-  
304 frequency (6 Hz) tACS did not successfully improve memory nor modulate the effect of RPEs on  
305 declarative learning. There was a small effect of stimulation on certainty in the correctly  
306 recognized words, but this effect requires replication and must currently be interpreted with  
307 caution.

308       Whereas the importance of RPEs in procedural learning has been well established, its role in  
309 declarative learning has remained elusive until recently. One of the first experimental  
310 paradigms examining the effect of RPEs in declarative learning was put forward by [54].  
311 Although this RPE effect on declarative memory could not be replicated [55,56], several  
312 research labs have since then used a range of experimental paradigms to investigate the role of  
313 RPEs in declarative learning. Most of these studies revealed positive effects of RPEs on  
314 declarative memory [6,57,58], but one study also reported negative effects [59] (for review see  
315 [5]). Overall, these studies (including the current one) support the claim that RPEs are a key  
316 factor in the formation of declarative memory.

317       Prior research has repeatedly shown a role of theta frequency in (reward) prediction error  
318 processing [60–63] as well as memory performance [19]. In particular, [23] provided direct  
319 evidence for a causal role of theta frequency in memory. Memory for multimodal (audio-visual)  
320 stimuli was enhanced only when these stimuli were modulated at the theta frequency and not  
321 at other frequencies. Furthermore, in an earlier EEG study from our lab, we examined the  
322 neural signatures of RPEs in declarative learning and found increased theta (4-8 Hz) power  
323 during reward feedback [8]. However, it must be noted that in this particular EEG study, theta  
324 frequency followed an unsigned RPE (URPE) pattern during reward feedback. Theta power thus  
325 increased for both large negative and large positive RPEs. This URPE pattern evolved into a  
326 SRPE pattern during reward feedback and was accompanied by power increases in the high-  
327 beta (20-30 Hz) and high-alpha (10-17 Hz) frequency bands. Although beta and alpha power  
328 followed a clear SRPE pattern, we opted not to stimulate at these frequencies as there is more  
329 inter-individual variability with regard to peak-frequency [64].



330 We hypothesized that declarative learning is facilitated by theta frequency synchronization.  
331 Neurons are synchronized when their activation is locked to a common (slow-wave) phase. In  
332 such case, spikes of pre- and postsynaptic neurons are highly correlated, enabling synaptic  
333 learning between pairs of neurons because synaptic plasticity relies on the precise spike-timing  
334 of neurons [65]. Theta phase may modulate spike timing-dependent plasticity by ensuring that  
335 (anatomically distant) neurons fire in synchrony [66,67]. As tACS modulates the spike timing of  
336 neurons [68], it is a promising tool to causally manipulate neural oscillations related to RPE-  
337 processing in declarative learning. For this reason, theta-frequency tACS was currently used to  
338 stimulate the MFC. Unfortunately, however, our tACS manipulation did not affect memory  
339 performance.

340 In the following section, we speculate why we found no effect of theta-frequency (6Hz)  
341 tACS and provide suggestions for future research. First, it remains possible that theta frequency  
342 has no effect on RPEs in declarative learning and declarative memory per se. Using a combined  
343 EEG-TMS setup, [69], applied beta-frequency TMS over the PFC and showed that beta  
344 frequency is indeed causally related to memory formation. As such, a future follow up to the  
345 current study would be to stimulate the PFC at beta frequency while participants acquire word  
346 pairs associated with RPEs of varying size and value. Second, tACS has a relatively low spatial  
347 resolution. As a consequence, current flow is not focal, but distributed across the entire scalp.  
348 Therefore, it is conceivable that our tACS manipulation did not exclusively stimulate the MFC.  
349 Due to a complex interplay of brain networks, it remains possible that other brain regions were  
350 stimulated as well, potentially interacting or interfering with our RPE effect in declarative  
351 learning. For instance, [70] applied theta-frequency (5 Hz) tACS over the ventrolateral

352 prefrontal cortex during the acquisition of face-occupation pairs in older adults. In line with our  
353 study, theta-frequency tACS did not affect memory performance. Using a high-definition (HD)  
354 tACS montage setup with smaller electrodes, might improve anatomical stimulation specificity.  
355 Another option to improve spatial resolution would be to use rhythmic Transcranial Magnetic  
356 Stimulation (TMS) [71]. In the same experimental paradigm where rTMS at beta frequency  
357 modulated declarative memory [69], tACS at beta frequency did not successfully modulate  
358 memory formation [72]. This finding thus further validates the use of (rhythmic) TMS over tACS.  
359 Instead of delivering single pulses as theta frequency, another procedure is to deliver high-  
360 frequency bursts at theta frequency. This procedure has also been shown to increase memory  
361 performance and certainty ratings [73,74] and thus is also a viable alternative for future  
362 research. Third, some authors raised the interesting issue of brain-state-dependent effects [75–  
363 78]. More specifically, tACS effects might depend on the current brain state a participant is in. If  
364 a participant is in an optimal brain state where brain networks are synchronized enabling high  
365 encoding efficiency, stimulating the learning brain might impair learning. If, however, a  
366 participant is in a non-optimal brain state where synchronization is less pronounced and  
367 accompanied by decreased encoding efficiency, then applying stimulation could facilitate  
368 learning and improve memory performance. As we could not measure participants' brain states  
369 in our study, it is possible that tACS interacted with ongoing brain states. Fourth, we used the  
370 same stimulation parameters for each participant. It would be interesting to see whether using  
371 individualized stimulation parameters would alter the results. This could be accomplished by  
372 using a closed-loop approach where brain signals are measured before, during, and after task  
373 execution by means of EEG. As such, individual peak frequencies can be extracted and

374 neurophysiological changes due to tACS stimulation can be measured [79], which can then be  
375 used to tailor stimulation parameters to each participant individually. Indeed, evidence has  
376 shown that stimulation parameters should ideally be adjusted to participants' internal brain  
377 states [80]. Fifth, due to logistical constraints, a between-subjects design was used. By doing so,  
378 individual differences are not easily controlled. This could be mitigated by using a within-  
379 subjects design, where each participant is subjected to a real and a sham stimulation condition.  
380 Finally, due to the lack of standardized tACS procedures across studies, it remains difficult to  
381 draw definitive conclusions. The absence of an effect highlights the importance for  
382 understanding its underlying mechanisms [81], and setting up general procedural guidelines  
383 with regard to neurostimulation studies [49,82].

384 In summary, the current study examined whether applying theta-frequency (6 Hz) tACS over  
385 the MFC modulates the RPE effect in declarative learning. Previous behavioral results were  
386 replicated, with SRPEs driving declarative learning. However, theta tACS over the MFC did not  
387 modulate the effect of RPEs on declarative learning, and we proposed guidelines for future  
388 neuromodulation studies in declarative memory.

389

390 *Declarations of interest*

391 None.

392

393 *Acknowledgements*

394 We thank Lara Bardi for help with the tACS startup. KE conducted the research as a doctoral  
395 researcher, supported by grant 1153418N of the Research Foundation Flanders. EDL and TV  
396 were supported by grant BOF17-GOA-004 from the Research Council of Ghent University.

397

## References

- 398 1. Squire LR. Memory systems of the brain: A brief history and current perspective.  
399 Neurobiol Learn Mem. 2004;82(3):171–7.
- 400 2. Bastin C, Van der Linden M. The contribution of recollection and familiarity to  
401 recognition memory: A study of the effects of test format and aging. Neuropsychology.  
402 2003;17(1):14.
- 403 3. Eichenbaum H. Hippocampus: Cognitive processes and neural representations that  
404 underlie declarative memory. Neuron. 2004;44(1):109–20.
- 405 4. Greve A, Cooper E, Kaula A, Anderson MC, Henson R. Does prediction error drive one-  
406 shot declarative learning? J Mem Lang. 2017;94:149–65.
- 407 5. Ergo K, De Loof E, Verguts T. Reward prediction error and declarative memory. Trends  
408 Cogn Sci. 2020;24(5):388–97.
- 409 6. Rouhani N, Norman KA, Niv Y. Dissociable effects of surprising rewards on learning and  
410 memory. J Exp Psychol Learn Mem Cogn. 2018;44(9):1430–43.
- 411 7. De Loof E, Ergo K, Naert L, Janssens C, Talsma D, Van Opstal F, et al. Signed reward  
412 prediction errors drive declarative learning. Ito E, editor. PLoS One. 2018  
413 Jan;13(1):e0189212.
- 414 8. Ergo K, De Loof E, Janssens C, Verguts T. Oscillatory signatures of reward prediction  
415 errors in declarative learning. Neuroimage. 2019;186:137–45.

- 416 9. Calderon CB, De Loof E, Ergo K, Snoeck A, Boehler CN, Verguts T. Signed reward  
417 prediction errors in the ventral striatum drive episodic memory. *bioRxiv*. 2020 Jan  
418 3;2020.01.03.893578.
- 419 10. Schultz W, Dayan P, Montague PR. A neural substrate of prediction and reward. *Science*  
420 (80- ). 1997;275(5306):1593–9.
- 421 11. Watabe-Uchida M, Eshel N, Uchida N. Neural circuitry of reward prediction error. *Annu*  
422 *Rev Neurosci*. 2017;40(1):373–94.
- 423 12. Shohamy D, Adcock RA. Dopamine and adaptive memory. *Trends Cogn Sci*.  
424 2010;14(10):464–72.
- 425 13. Nieuwenhuis S, Holroyd CB, Mol N, Coles MGH. Reinforcement-related brain potentials  
426 from medial frontal cortex: Origins and functional significance. *Neurosci Biobehav Rev*.  
427 2004 Jul 1;28(4):441–8.
- 428 14. Lisman JE, Grace AA, Duzel E. A neoHebbian framework for episodic memory; role of  
429 dopamine-dependent late LTP. *Trends Neurosci*. 2011 Oct;34(10):536–47.
- 430 15. Herweg NA, Solomon EA, Kahana MJ. Theta oscillations in human memory. *Trends Cogn*  
431 *Sci*. 2019;24(3):20.
- 432 16. Klimesch W. EEG alpha and theta oscillations reflect cognitive and memory performance:  
433 A review and analysis. *Brain Res Rev*. 1999;29(2):169–95.
- 434 17. Fries P. A mechanism for cognitive dynamics: Neuronal communication through neuronal  
435 coherence. *Trends Cogn Sci*. 2005;9(10):474–80.

- 436 18. Osipova D, Takashima A, Oostenveld R, Fernández G, Maris E, Jensen O. Theta and  
437 gamma oscillations predict encoding and retrieval of declarative memory. *J Neurosci.*  
438 2006;26(28):7523–31.
- 439 19. Sederberg PB, Kahana MJ, Howard MW, Donner EJ, Madsen JR. Theta and gamma  
440 oscillations during encoding predict subsequent recall. *J Neurosci.* 2003;23(34):10809–  
441 14.
- 442 20. Summerfield C, Mangels JA. Coherent theta-band EEG activity predicts item-context  
443 binding during encoding. *Neuroimage.* 2005;24:692–703.
- 444 21. Solomon EA, Stein JM, Das S, Gorniak R, Sperling MR, Worrell G, et al. Dynamic theta  
445 networks in the human medial temporal lobe support episodic memory. *Curr Biol.* 2019  
446 Apr 1;29(7):1100–11.
- 447 22. Wang D, Clouter A, Chen Q, Shapiro KL, Hanslmayr S. Single-trial phase entrainment of  
448 theta oscillations in sensory regions predicts human associative memory performance. *J*  
449 *Neurosci.* 2018 Jun 13;38(28):6299–309.
- 450 23. Clouter A, Shapiro KL, Hanslmayr S. Theta phase synchronization is the glue that binds  
451 human associative memory. *Curr Biol.* 2017;27(23):3143–8.
- 452 24. Gruber MJ, Hsieh L-T, Staresina BP, Elger CE, Fell J, Axmacher N, et al. Theta phase  
453 synchronization between the human hippocampus and the prefrontal cortex supports  
454 learning of unexpected information. *J Cogn Neurosci.* 2018;30(11):1646–56.
- 455 25. Preston AR, Eichenbaum H. Interplay of hippocampus and prefrontal cortex in memory.

- 456 Curr Biol. 2013;23(17):R764–73.
- 457 26. Euston DR, Gruber AJ, Mcnaughton BL. The role of medial prefrontal cortex in memory  
458 and decision making. *Neuron*. 2012;76(6):1057–70.
- 459 27. De La Vega A, Chang LJ, Banich MT, Wager TD, Yarkoni T. Large-scale meta-analysis of  
460 human medial frontal cortex reveals tripartite functional organization. *J Neurosci*. 2016  
461 Jun 15;36(24):6553–62.
- 462 28. Gehring WJ, Willoughby AR. The medial frontal cortex and the rapid processing of  
463 monetary gains and losses. *Science (80- )*. 2002;295(5563):2279–82.
- 464 29. Vassena E, Silvetti M, Boehler CN, Achten E, Fias W, Verguts T. Overlapping neural  
465 systems represent cognitive effort and reward anticipation. *PLoS One*. 2014 Mar 7;9(3).
- 466 30. Oliveira FTP, McDonald JJ, Goodman D. Performance monitoring in the anterior cingulate  
467 is not all error related: Expectancy deviation and the representation of action-outcome  
468 associations. *J Cogn Neurosci*. 2007;19(12):1994–2004.
- 469 31. Jessup RK, Busemeyer JR, Brown JW. Error effects in anterior cingulate cortex reverse  
470 when error likelihood is high. *J Neurosci*. 2010 Mar 3;30(9):3467–72.
- 471 32. Silvetti M, Vassena E, Abrahamse E, Verguts T. Dorsal anterior cingulate-brainstem  
472 ensemble as a reinforcement meta-learner. *PLoS Comput Biol*. 2018 Aug  
473 1;14(8):e1006370.
- 474 33. Berens SC, Horner AJ. Theta rhythm: Temporal glue for episodic memory. *Curr Biol*.  
475 2017;27(20):R1110–2.



- 476 34. Backus AR, Schoffelen J-M, Szebényi S, Hanslmayr S, Doeller CF. Hippocampal-prefrontal  
477 theta oscillations support memory integration. *Curr Biol*. 2016;26(4):450–7.
- 478 35. Thut G, Bergmann TO, Fröhlich F, Soekadar SR, Brittain JS, Valero-Cabré A, et al. Guiding  
479 transcranial brain stimulation by EEG/MEG to interact with ongoing brain activity and  
480 associated functions: A position paper. Vol. 128, *Clinical Neurophysiology*. Elsevier  
481 Ireland Ltd; 2017. p. 843–57.
- 482 36. Zaehle T, Rach S, Herrmann CS. Transcranial alternating current stimulation enhances  
483 individual alpha activity in human EEG. *PLoS One*. 2010;5(11):1–7.
- 484 37. Antal A, Paulus W. Transcranial alternating current stimulation (tACS). *Front Hum*  
485 *Neurosci*. 2013;7:317.
- 486 38. Ambrus GG, Pisoni A, Primaßin A, Turi Z, Paulus W, Antal A. Bi-frontal transcranial  
487 alternating current stimulation in the ripple range reduced overnight forgetting. *Front*  
488 *Cell Neurosci*. 2015;9:374.
- 489 39. Jaušovec N, Jaušovec K. Increasing working memory capacity with theta transcranial  
490 alternating current stimulation (tACS). *Biol Psychol*. 2014;96:42–7.
- 491 40. Pahor A, Jaušovec N. The effects of theta and gamma tACS on working memory and  
492 electrophysiology. *Front Hum Neurosci*. 2018;11:651.
- 493 41. Chander BS, Witkowski M, Braun C, Robinson SE, Born J, Cohen LG, et al. tACS phase  
494 locking of frontal midline theta oscillations disrupts working memory performance. *Front*  
495 *Cell Neurosci*. 2016;10:120.

- 496 42. Alekseichuk, Turi Z, Lara G de, Antal A, Biology WP-C, 2016 U. Spatial working memory in  
497 humans depends on theta and high gamma synchronization in the prefrontal cortex. *Curr*  
498 *Biol.* 2016;26(12):1513–21.
- 499 43. Albouy P, Weiss A, Baillet S, Zatorre RJ. Selective entrainment of theta oscillations in the  
500 dorsal stream causally enhances auditory working memory performance. *Neuron.* 2017  
501 Apr 5;94(1):193–206.
- 502 44. Vosskuhl J, Huster RJ, Herrmann CS. Increase in short-term memory capacity induced by  
503 down-regulating individual theta frequency via transcranial alternating current  
504 stimulation. *Front Hum Neurosci.* 2015;9:257.
- 505 45. Lang S, Gan LS, Alrazi T, Monchi O. Theta band high definition transcranial alternating  
506 current stimulation, but not transcranial direct current stimulation, improves associative  
507 memory performance. *Sci Rep.* 2019;9(1):8562.
- 508 46. Alekseichuk I, Turi Z, Veit S, Paulus W. Model-driven neuromodulation of the right  
509 posterior region promotes encoding of long-term memories. *Brain Stimul.* 2020 Mar  
510 1;13(2):474–83.
- 511 47. Peirce JW. PsychoPy—psychophysics software in Python. *J Neurosci Methods.*  
512 2007;162(1–2):8–13.
- 513 48. Fertonani A, Ferrari C, Miniussi C. What do you feel if I apply transcranial electric  
514 stimulation? Safety, sensations and secondary induced effects. *Clin Neurophysiol.* 2015  
515 Nov 1;126(11):2181–8.

- 516 49. Nitsche MA, Cohen LG, Wassermann EM, Priori A, Lang N, Antal A, et al. Transcranial  
517 direct current stimulation: State of the art 2008. *Brain Stimul.* 2008;1(3):206–23.
- 518 50. R Core Team. R: A language and environment for statistical computing. R Found Stat  
519 Comput Vienna, Austria. 2014;
- 520 51. JASP Team. JASP (Version 0.13)[Computer software] [Internet]. 2020. Available from:  
521 <https://jasp-stats.org/>
- 522 52. Rouder JN, Morey RD, Speckman PL, Province JM. Default Bayes factors for ANOVA  
523 designs. *J Math Psychol.* 2012;56:356–74.
- 524 53. Jeffreys H. The theory of probability. 3rd ed. New York, NY: Oxford University Press.;  
525 1961.
- 526 54. Bunzeck N, Dayan P, Dolan RJ, Duzel E. A common mechanism for adaptive scaling of  
527 reward and novelty. *Hum Brain Mapp.* 2010;31(9):1380–94.
- 528 55. Mason A, Ludwig C, Farrell S. Adaptive scaling of reward in episodic memory: A  
529 replication study. *Q J Exp Psychol.* 2017;70(11):2306–18.
- 530 56. Mason A, Farrell S, Howard-Jones P, Ludwig CJH. The role of reward and reward  
531 uncertainty in episodic memory. *J Mem Lang.* 2017;96:62–77.
- 532 57. Davidow JY, Foerde K, Galvan A, Shohamy D. An upside to reward sensitivity: The  
533 hippocampus supports enhanced Reinforcement Learning in adolescence. *Neuron.*  
534 2016;92(1):93–9.
- 535 58. Jang AI, Nassar MR, Dillon DG, Frank MJ. Positive reward prediction errors during

- 536 decision-making strengthen memory encoding. *Nat Hum Behav.* 2019;3(7):719–32.
- 537 59. Wimmer GE, Braun EK, Daw ND, Shohamy D. Episodic memory encoding interferes with  
538 reward learning and decreases striatal prediction errors. *J Neurosci.* 2014;34(45):14901–  
539 12.
- 540 60. Cavanagh JF, Figueroa CM, Cohen MX, Frank MJ. Frontal theta reflects uncertainty and  
541 unexpectedness during exploration and exploitation. *Cereb Cortex.* 2012  
542 Nov;22(11):2575–86.
- 543 61. Cavanagh JF, Frank MJ, Klein TJ, Allen JJB. Frontal theta links prediction errors to  
544 behavioral adaptation in reinforcement learning. *Neuroimage.* 2010 Feb;49(4):3198–209.
- 545 62. Mas-Herrero E, Marco-Pallarés J. Frontal theta oscillatory activity is a common  
546 mechanism for the computation of unexpected outcomes and learning rate. *J Cogn  
547 Neurosci.* 2014;26(3):447–58.
- 548 63. Cavanagh JF, Cohen MX, Allen JJB. Prelude to and resolution of an error: EEG phase  
549 synchrony reveals cognitive control dynamics during action monitoring. *Neuroscience.*  
550 2009;29(1):98–105.
- 551 64. Haegens S, Cousijn H, Wallis G, Harrison PJ, Nobre AC. Inter- and intra-individual  
552 variability in alpha peak frequency. *Neuroimage.* 2014;92:46–55.
- 553 65. Caporale N, Dan Y. Spike timing–dependent plasticity: A Hebbian learning rule. *Annu Rev  
554 Neurosci.* 2008;31:25–46.
- 555 66. Fell J, Axmacher N. The role of phase synchronization in memory processes. *Nat Rev*

- 556            Neurosci. 2011;12(2):105–18.
- 557    67.    Rutishauser U, Ross IB, Mamelak AN, Schuman EM. Human memory strength is predicted  
558            by theta-frequency phase-locking of single neurons. *Nature*. 2010;464(7290):903–7.
- 559    68.    Reato D, Rahman A, Bikson M, Parra LC. Low-intensity electrical stimulation affects  
560            network dynamics by modulating population rate and spike timing. *J Neurosci*.  
561            2010;30(45):15067–79.
- 562    69.    Hanslmayr S, Matuschek J, Fellner MC. Entrainment of prefrontal beta oscillations  
563            induces an endogenous echo and impairs memory formation. *Curr Biol*. 2014;24(8):904–  
564            9.
- 565    70.    Klink K, Peter J, Wyss P, Klöppel S. Transcranial electric current stimulation during  
566            associative memory encoding: Comparing tACS and tDCS effects in healthy aging. *Front*  
567            *Aging Neurosci*. 2020;12:66.
- 568    71.    Thut G, Veniero D, Romei V, Miniussi C, Schyns P, Gross J. Rhythmic TMS causes local  
569            entrainment of natural oscillatory signatures. *Curr Biol*. 2011;21(14):1176–85.
- 570    72.    Braun V, Sokoliuk R, Hanslmayr S. On the effectiveness of event-related beta tACS on  
571            episodic memory formation and motor cortex excitability. *Brain Stimul*. 2017 Sep  
572            1;10(5):910–8.
- 573    73.    Demeter E, Mirdamadi JL, Meehan SK, Taylor SF. Short theta burst stimulation to left  
574            frontal cortex prior to encoding enhances subsequent recognition memory. *Cogn Affect*  
575            *Behav Neurosci*. 2016;16(4):724–35.

- 576 74. Tambini A, Nee DE, D'Esposito M. Hippocampal-targeted theta-burst stimulation  
577 enhances associative memory formation. *J Cogn Neurosci*. 2017;30(10):1452–72.
- 578 75. Ezzyat Y, Kragel JE, Burke JF, Gorniak R, Rizzuto DS, Kahana MJ, et al. Direct brain  
579 stimulation modulates encoding states and memory performance in humans. *Curr Biol*.  
580 2017;27:1251–8.
- 581 76. Hanslmayr S, Roux F. Human memory: Brain-state-dependent effects of stimulation. *Curr*  
582 *Biol*. 2017;27(10):385–7.
- 583 77. Bergmann TO. Brain state-dependent brain stimulation. *Front Psychol*. 2018;9:2108.
- 584 78. Nguyen J, Deng Y, Reinhart RMG. Brain-state determines learning improvements after  
585 transcranial alternating-current stimulation to frontal cortex. *Brain Stimul*.  
586 2018;11(4):723–6.
- 587 79. Fehér KD, Morishima Y. Concurrent electroencephalography recording curing  
588 transcranial alternating current stimulation (tACS). *JoVE (Journal Vis Exp)*.  
589 2016;107:e53527.
- 590 80. Kim K, Ekstrom AD, Tandon N. A network approach for modulating memory processes via  
591 direct and indirect brain stimulation: Toward a causal approach for the neural basis of  
592 memory. *Neurobiol Learn Mem*. 2016 Oct 1;134:162–77.
- 593 81. Hanslmayr S, Axmacher N, Inman CS. Modulating human memory via entrainment of  
594 brain oscillations. *Trends Neurosci*. 2019 Jul 1;42(7):485–99.
- 595 82. Tavakoli A V, Yun K. Transcranial alternating current stimulation (tACS) mechanisms and

596 protocols. Front Cell Neurosci. 2017;11:214.

597

598

## Supporting Information

599 **S1 Tables. Stimulus Material.**

600 **S2 File. Sensations Questionnaire.**

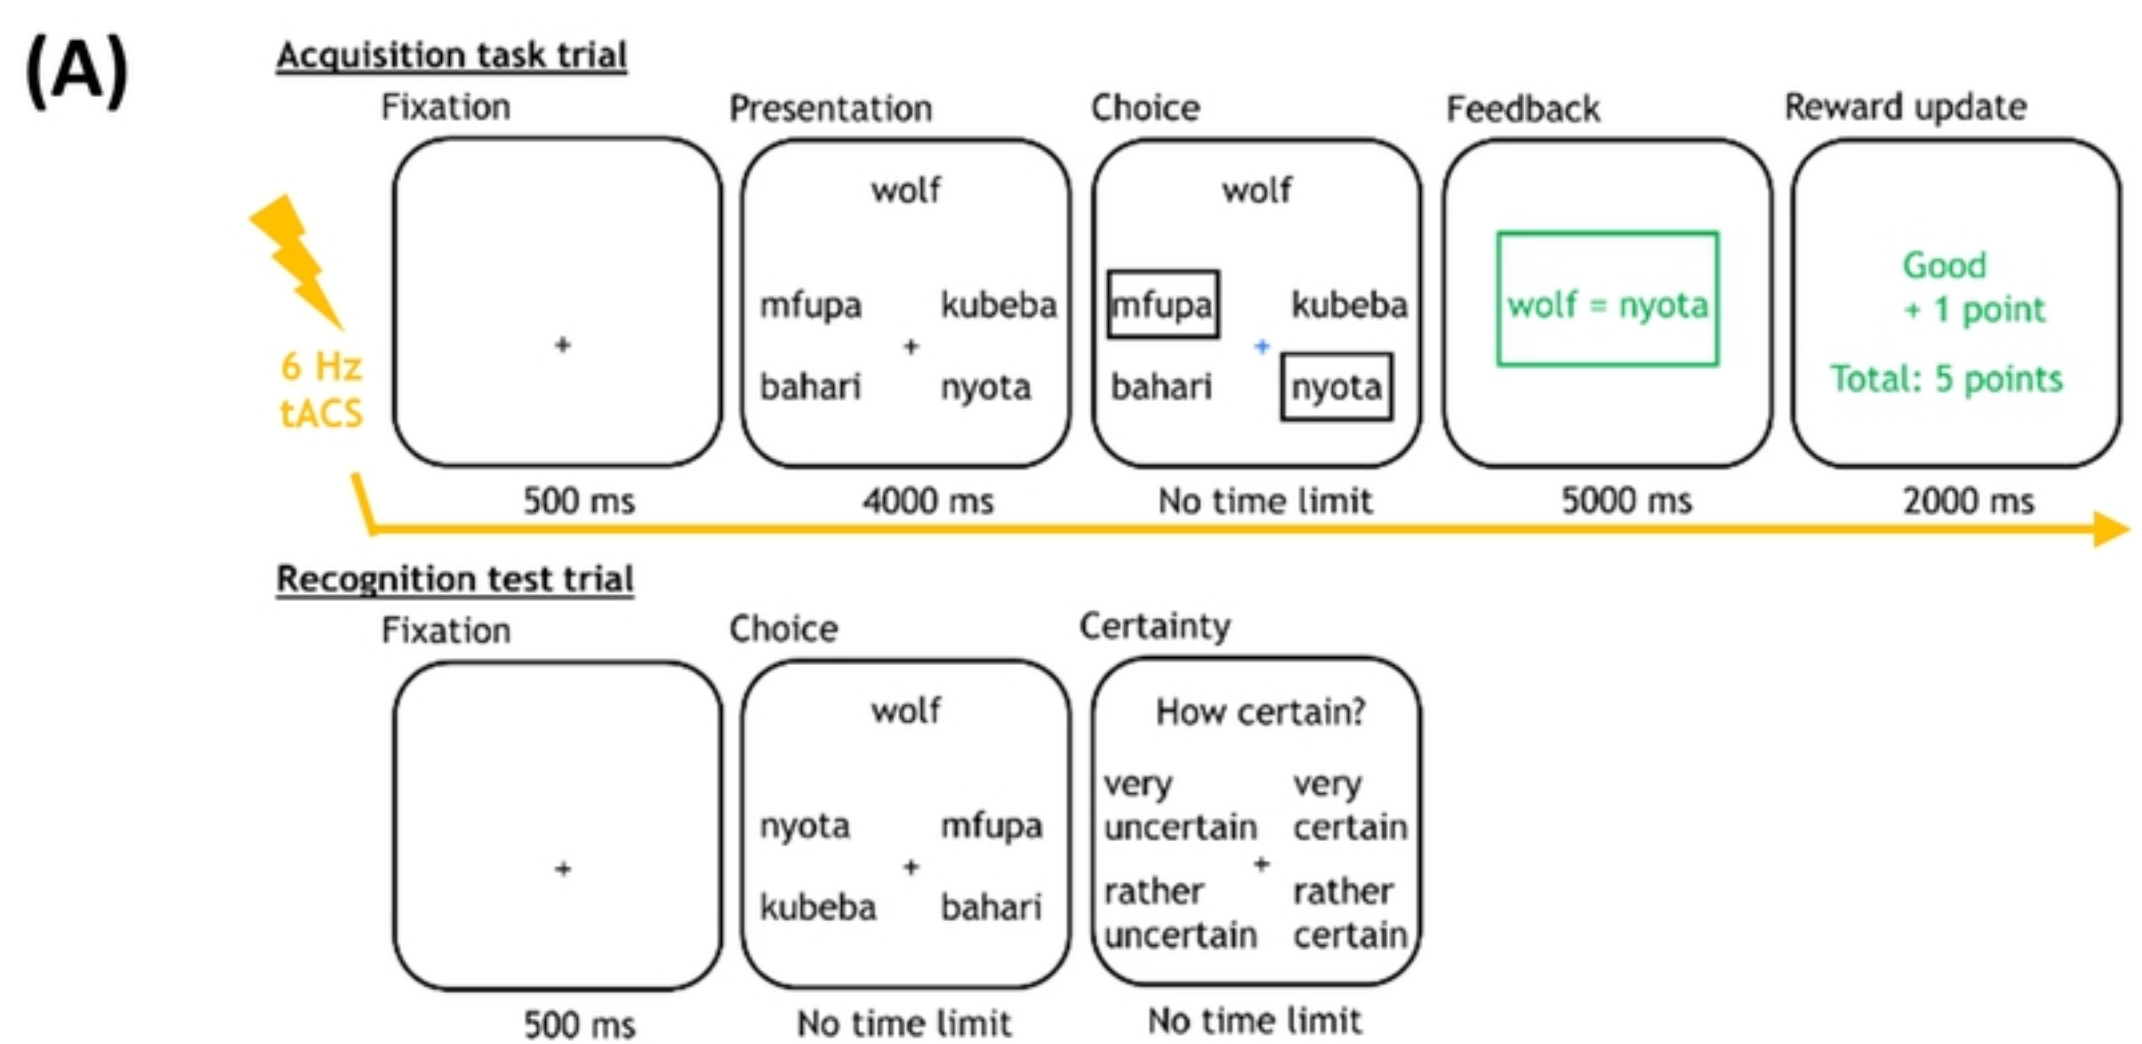

**(B)**

bioRxiv preprint doi: <https://doi.org/10.1101/2020.08.05.237529>; this version posted August 5, 2020. The copyright holder for this preprint (which was not certified by peer review) is the author/funder, who has granted bioRxiv a license to display the preprint in perpetuity. It is made available under aCC-BY 4.0 International license.

|                   | 1 option                                                  | 2 options                                                        | 4 options                                                           |
|-------------------|-----------------------------------------------------------|------------------------------------------------------------------|---------------------------------------------------------------------|
| Rewarded choice   | 20 trials<br>wolf = nyota<br>SRPE = 1 - 1 = 0<br>URPE = 0 | 10 trials<br>wolf = nyota<br>SRPE = 1 - 0.5 = 0.5<br>URPE = 0.5  | 5 trials<br>wolf = nyota<br>SRPE = 1 - 0.25 = 0.75<br>URPE = 0.75   |
| Unrewarded choice |                                                           | 10 trials<br>wolf = mfupa<br>SRPE = 0 - 0.5 = -0.5<br>URPE = 0.5 | 15 trials<br>wolf = mfupa<br>SRPE = 0 - 0.25 = -0.25<br>URPE = 0.75 |

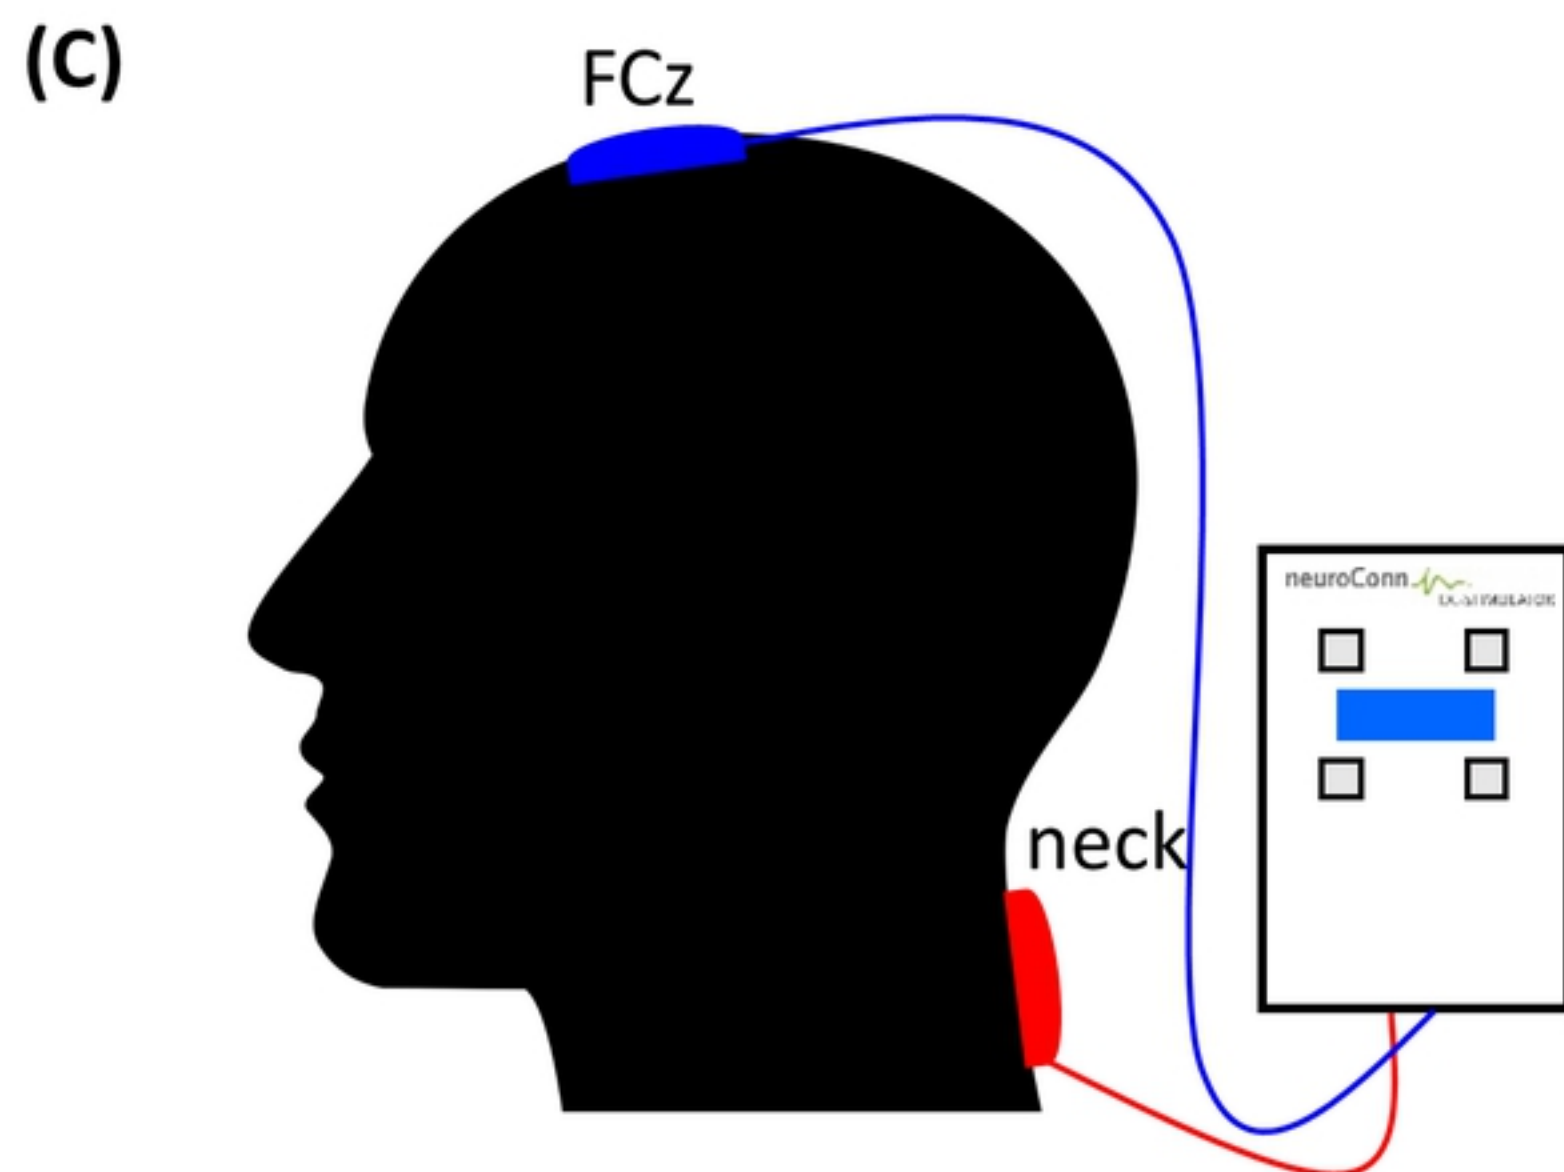

Figure 1



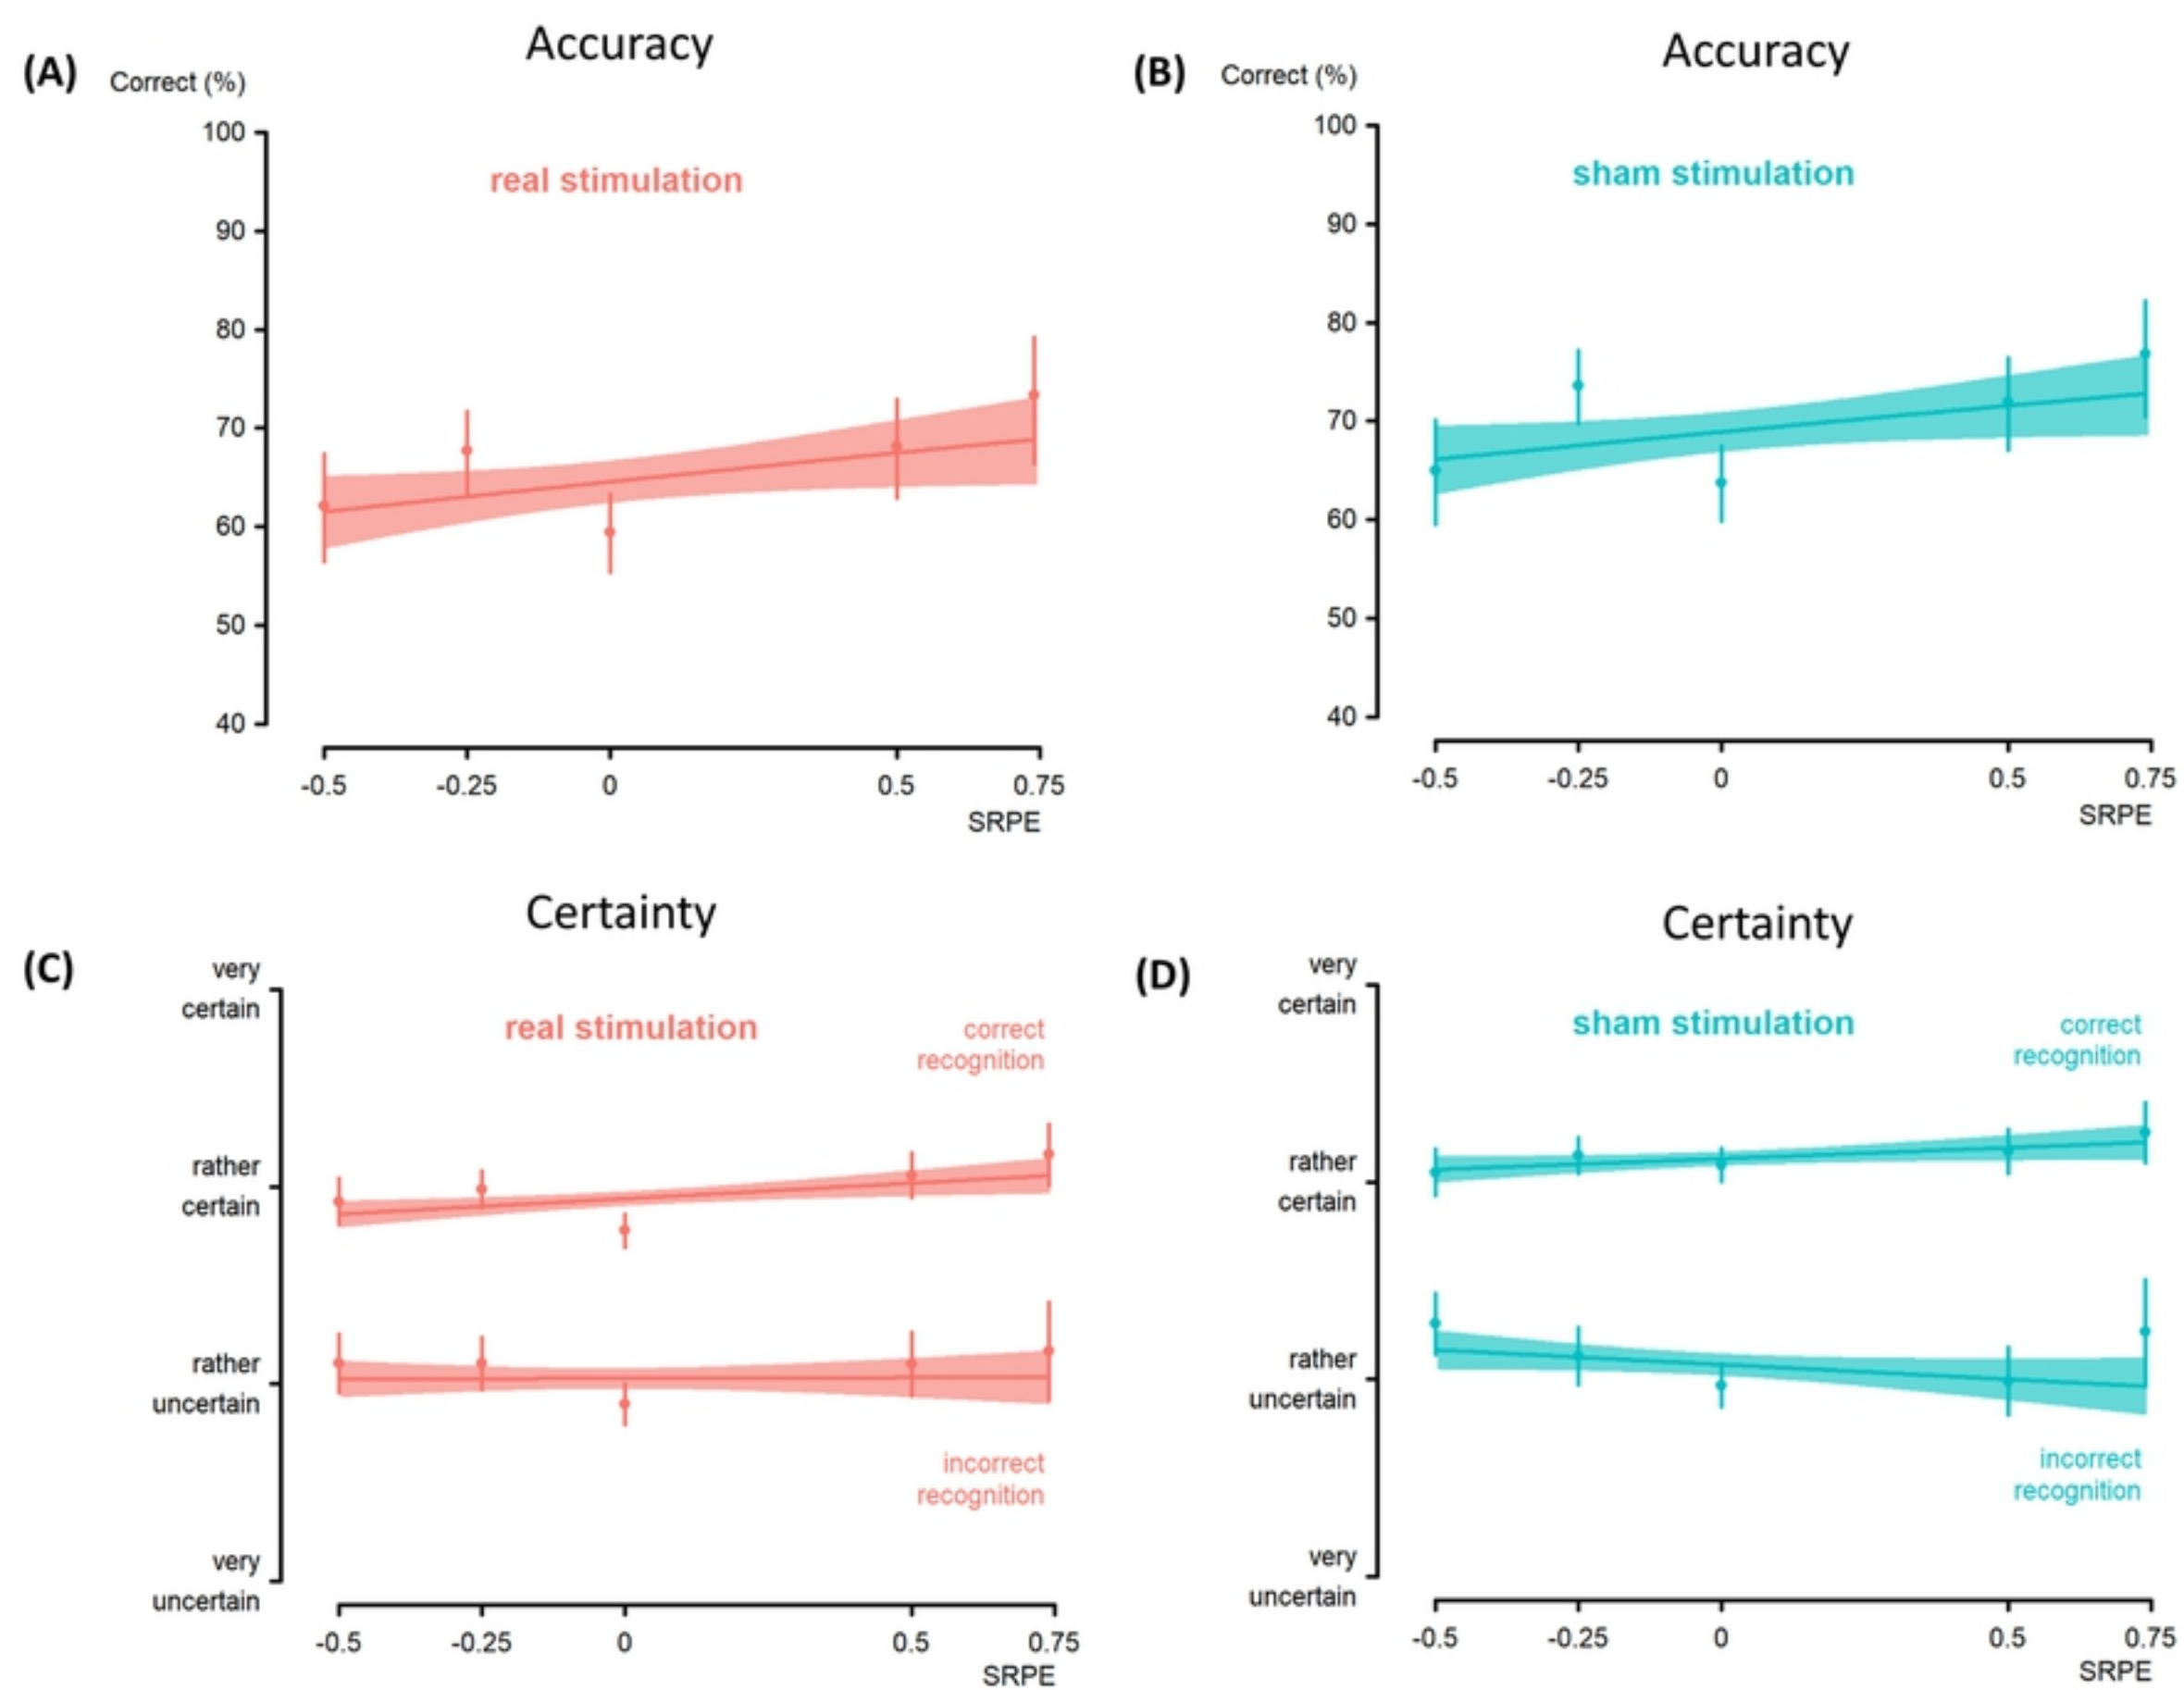

Figure2
